# Supplementary material for: Fe/N/C hollow nanospheres by Fe(iii)-dopamine complexation-assisted one-pot doping as nonprecious-metal electrocatalysts for oxygen reduction
Source: Royal Society of Chemistry journal article supplement (doi:10.1039/c4nr06366j), 2014-12-03
Supplement: c4nr06366j1.pdf [file c4nr06366j1.pdf]

## Supporting Information (SI):

# **Fe/N/C hollow nanospheres by Fe(III)-dopamine complexation-assisted one-pot doping as nonprecious-metal electrocatalysts for oxygen reduction**

*Dan Zhou<sup>a</sup>, Liping Yang<sup>b</sup>, Linghui Yu<sup>a</sup>, Junhua Kong<sup>a</sup>, Xiayin Yao<sup>a</sup>, Wanshuang Liu<sup>a</sup>,  
Zhichuan Xu<sup>a</sup>, Xuehong Lu<sup>a\*</sup>*

*<sup>a</sup> School of Materials Science and Engineering, Nanyang Technological University, 50 Nanyang Avenue, Singapore 639798*

*<sup>b</sup> Institute of Chemical and Engineering Sciences, A\*STAR (Agency for Science, Technology and Research), 1 Pesek Road, Jurong Island, Singapore 627833, Singapore*

*\* E-mail: [asxhlu@ntu.edu.sg](mailto:asxhlu@ntu.edu.sg)*

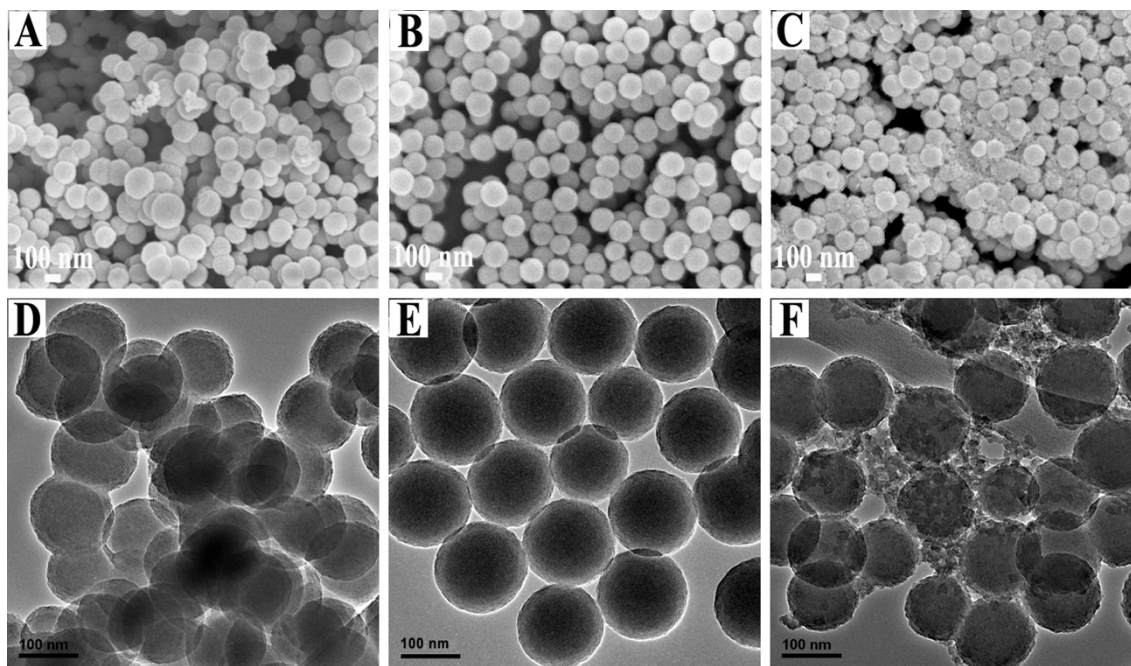

**Figure S1.** FESEM images of Fe<sup>3+</sup>-PDA@SiO<sub>2</sub> prepared with different amounts of FeCl<sub>3</sub>: (A) 0.141 g, (B) 0.213 g, and (C) 0.281 g. TEM images of Fe<sup>3+</sup>-PDA@SiO<sub>2</sub> prepared with different amounts of FeCl<sub>3</sub>: (D) 0.141 g, (E) 0.213 g, and (F) 0.281 g.

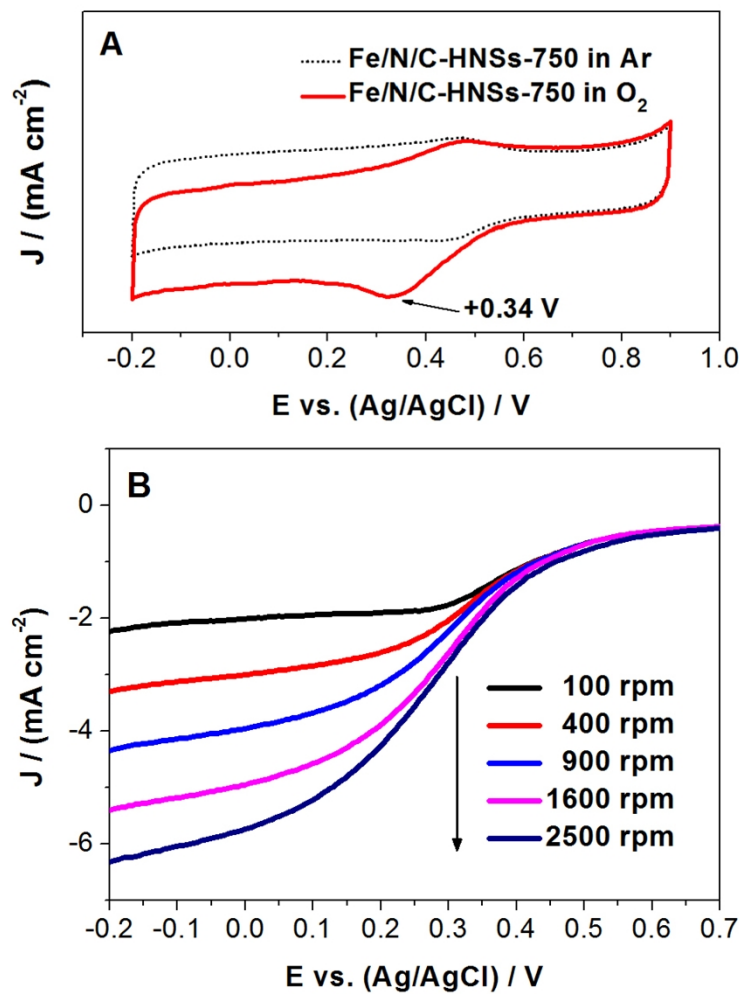

**Figure S2.** (A) CV curves of Fe/N/C HNSs-750 in Ar- and  $\text{O}_2$ -saturated 0.5 M  $\text{H}_2\text{SO}_4$  solution (scan rate:  $10 \text{ mV s}^{-1}$ ). (B) Polarization curves of Fe/N/C HNSs-750 in  $\text{O}_2$ -saturated 0.5 M  $\text{H}_2\text{SO}_4$  solution (scan rate:  $10 \text{ mV s}^{-1}$ ) at different rotation rates.
